# Supplementary material
Source: Springer Nature journal article supplement (https://www.springermedizin.de/resource/supplementary/12947_2009_304_MOESM6_ESM.pdf/9556658)

Apical and lateral displacements of PM

LV

Tented-leaflet configuration

Annulus dilation

Delayed valve closure  
(increase in pre-coaptation regurgitant volume)

LV

Reduced coaptation time

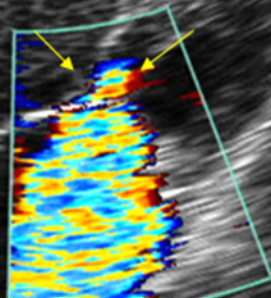

Supplement: MOESM6 [file 9556658]
